# Supplementary material for: A galvanic replacement-based Cu2O self-templating strategy for the synthesis and application of Cu2O–Ag heterostructures and monometallic (Ag) and bimetallic (Au–Ag) hollow mesocages
Source: Royal Society of Chemistry journal article supplement (doi:10.1039/c7ce00110j), 2017-01-01
Supplement: c7ce00110j1.pdf [file c7ce00110j1.pdf]

## ELECTRONIC SUPPORTING INFORMATION

Galvanic replacement based  $\text{Cu}_2\text{O}$  self-templating strategy for the synthesis and application of  $\text{Cu}_2\text{O}$ -Ag heterostructures, and hollow metallic (Ag, Au-Ag) mesocages

Rangarajan Bakthavatsalam, and Janardan Kundu\*

Physical and Materials Chemistry Division, CSIR-National Chemical Laboratory,  
Dr. Homi Bhabha Road, Pashan, Pune, Maharashtra, 411008, India.

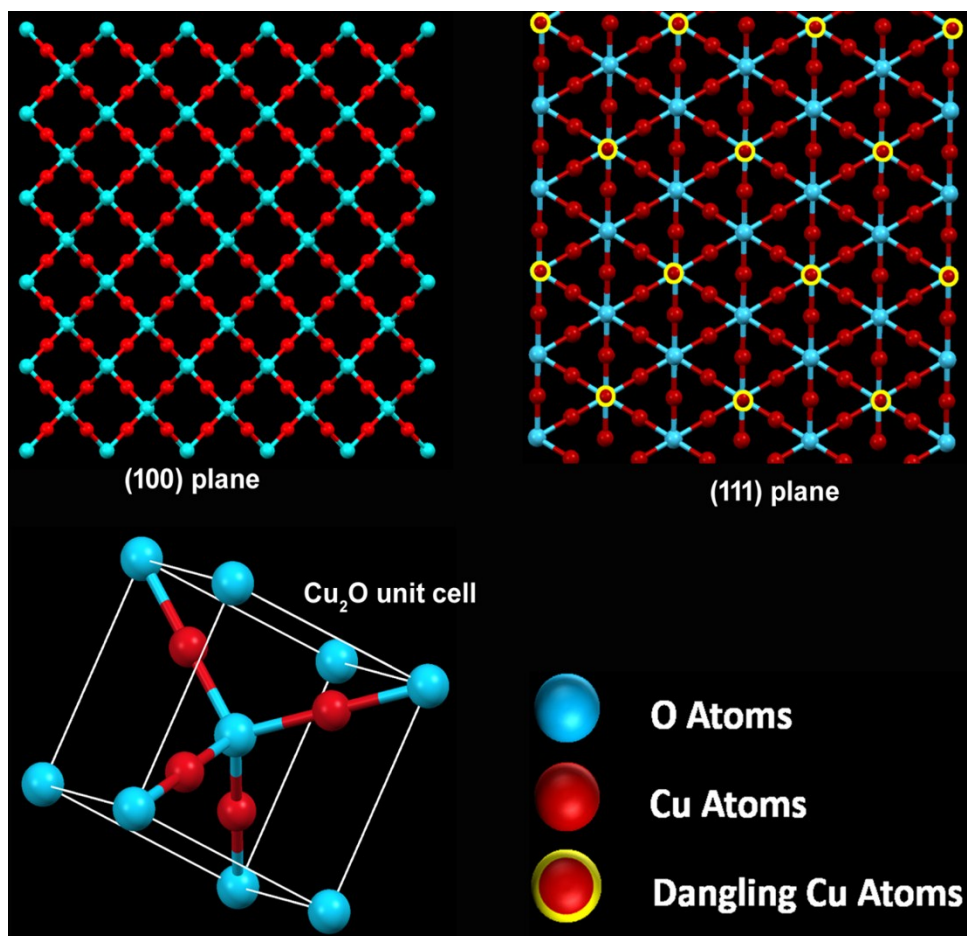

**Figure S1:** Crystal structure of  $\text{Cu}_2\text{O}$  with (100), (111) planes, and unit cell structure. The Cu atoms with dangling bonds are highlighted with yellow circles (All representations were obtained using Mercury 3.8 Software).

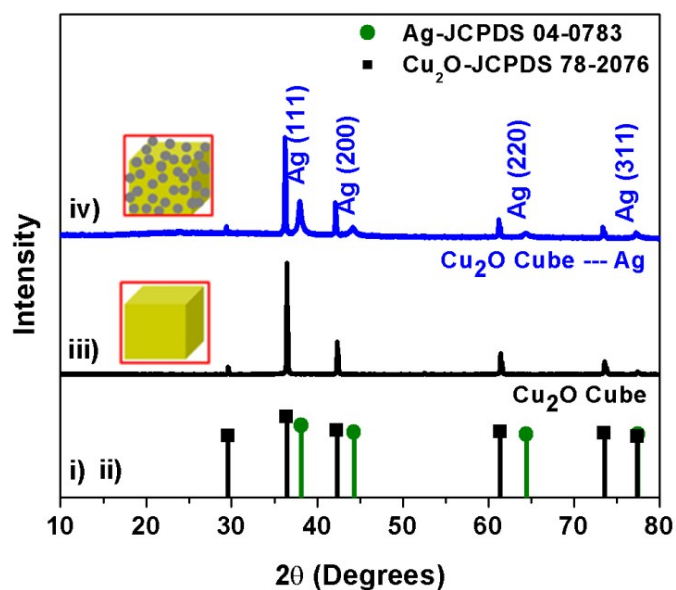

**Figure S2:** Powder XRD pattern of i) standard  $\text{Cu}_2\text{O}$  JCPDS file 78-2076, ii) standard Ag JCPDS file 04-0783, iii) Cubic  $\text{Cu}_2\text{O}$  particles, and iv) Cubic  $\text{Cu}_2\text{O}$ -Ag composite hetrostructure.

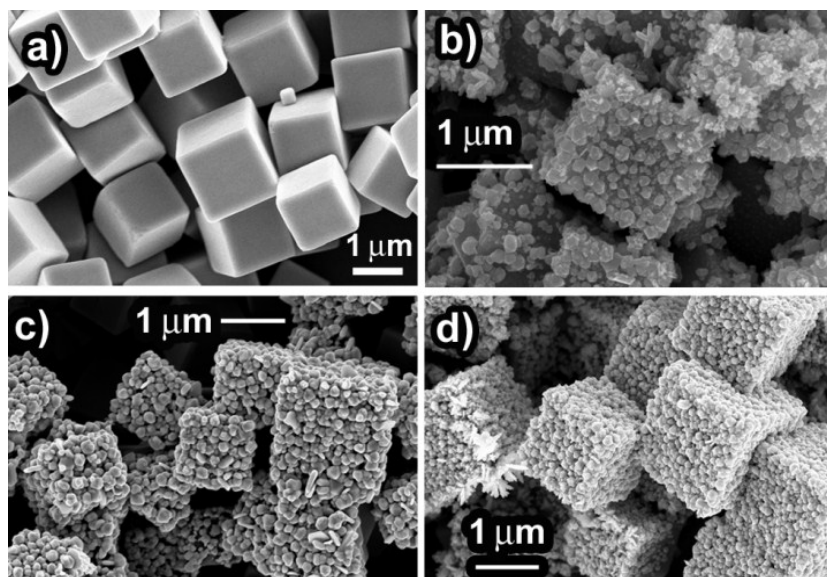

**Figure S3:** a) FESEM image of  $\text{Cu}_2\text{O}$  cube before GRR. b-d) FESEM image of cubic  $\text{Cu}_2\text{O}$ -Ag heterostructures after undergoing GRR with increasing  $[\text{AgNO}_3]$  solution clearly showing increased loading density of Ag NPs decorating the cubic  $\text{Cu}_2\text{O}$  surface.

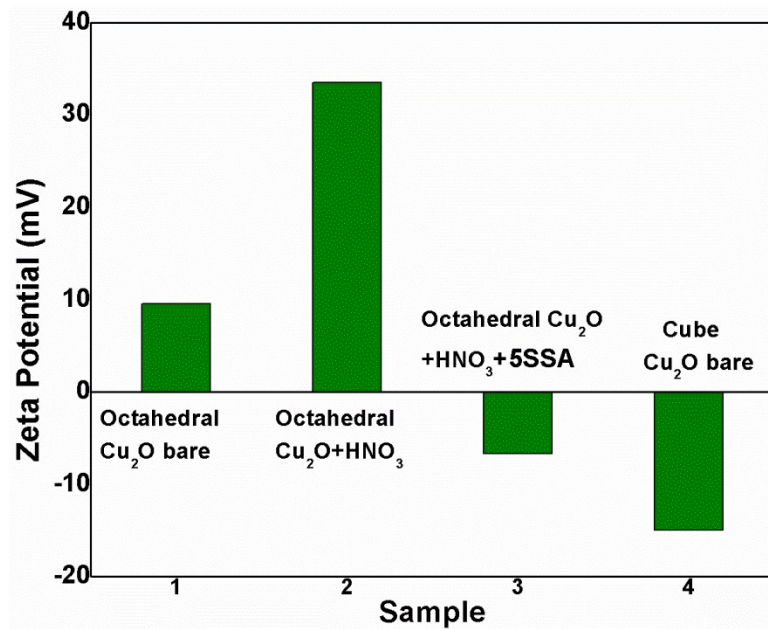

Figure S4: Zeta potential values measured for different samples under the experimental conditions.

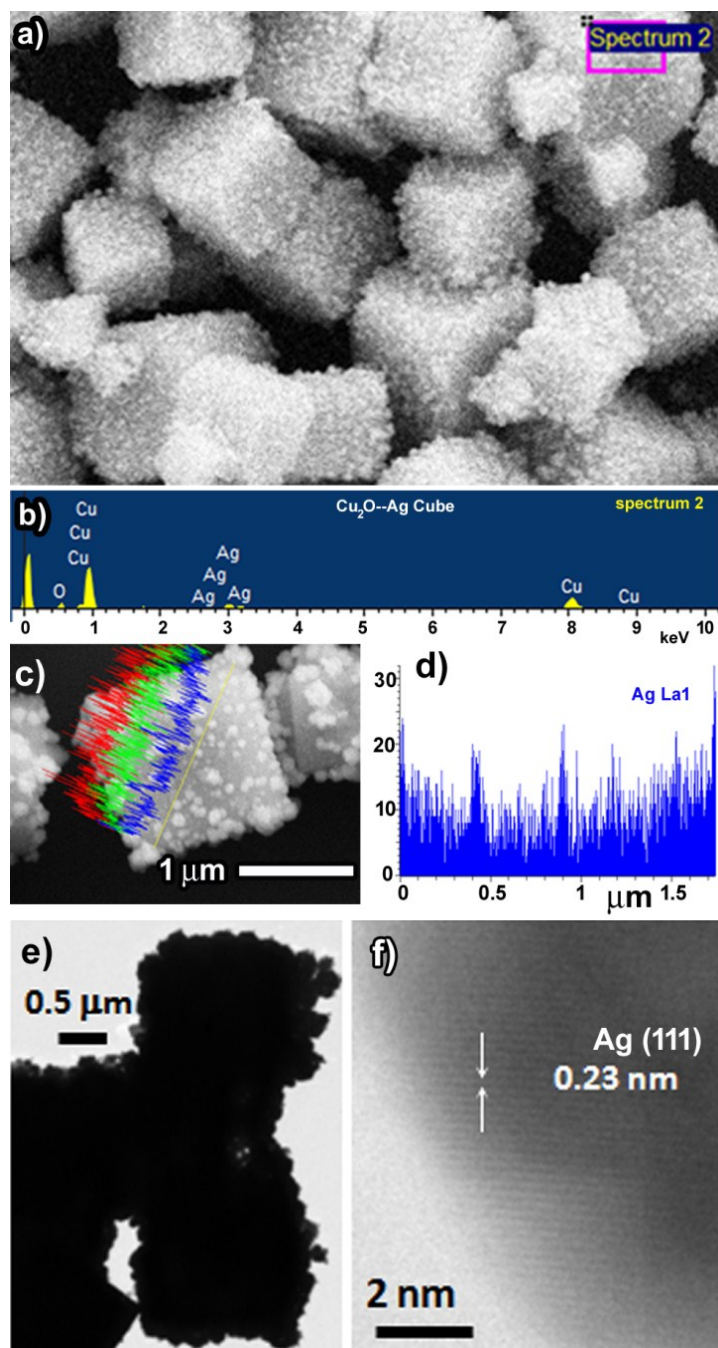

**Figure S5:** EDS spectrum of the (b) Cubic  $\text{Cu}_2\text{O}$ -Ag heterostructures from the highlighted region of the sample shown in (a) Line-scan EDS analysis of a (c-d) cubic  $\text{Cu}_2\text{O}$ -Ag heterostructure clearly identifying the Ag NPs decorating the surface of  $\text{Cu}_2\text{O}$  particles. TEM image of e) cubic  $\text{Cu}_2\text{O}$ -Ag heterostructure; f) observed lattice fringes from Ag NPs on the cubic  $\text{Cu}_2\text{O}$ -Ag heterostructure.

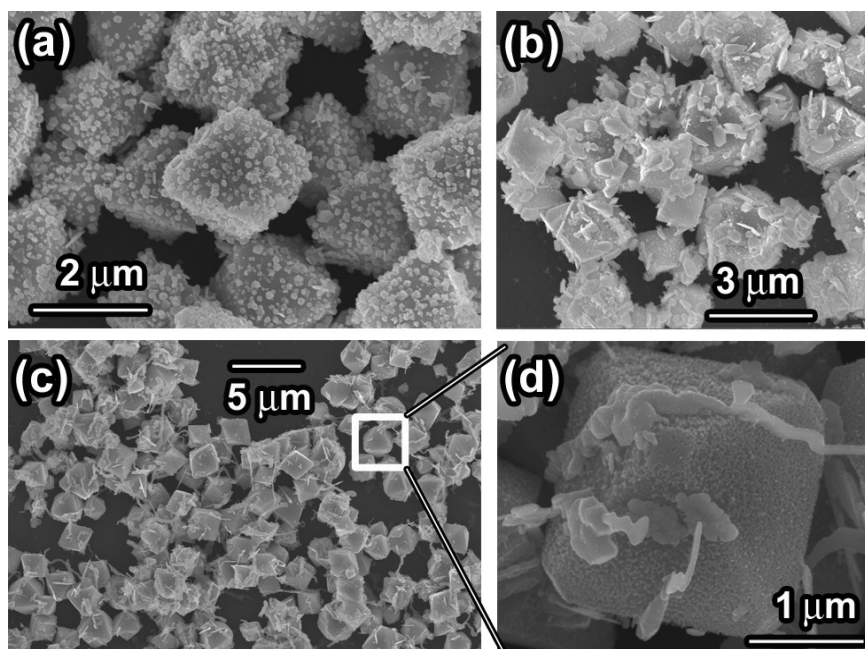

**Figure S6:** Effect of nitric acid and 5SSA on the morphology of the heterostructure: a)  $\text{Cu}_2\text{O}$  octahedra undergoing GRR with silver nitrate in presence of a) nitric acid and 5SSA; b) nitric acid only c) 5SSA only; d) magnified view of c).

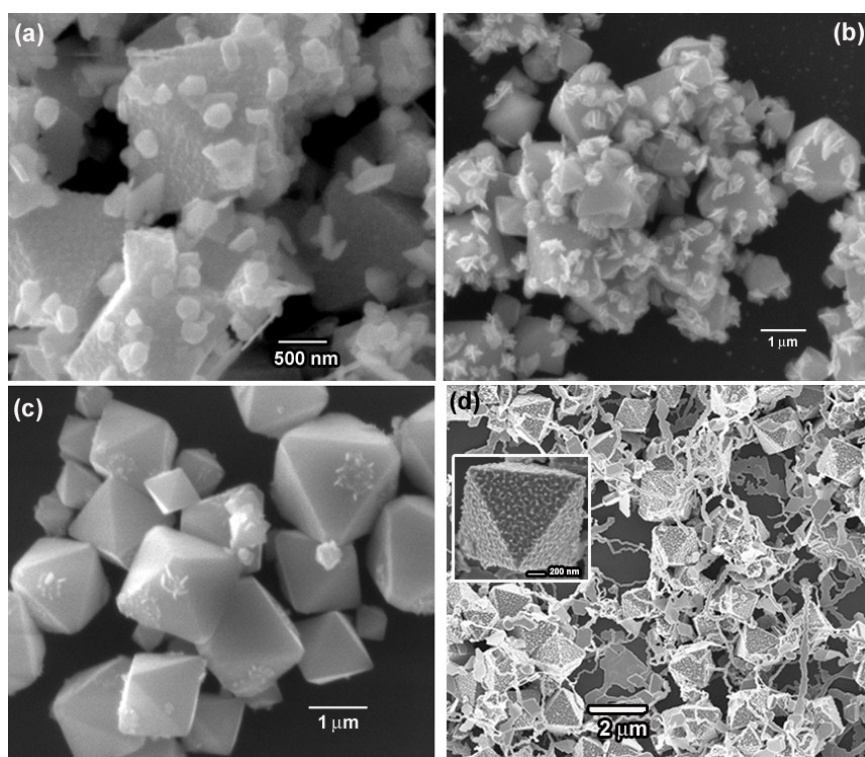

**Figure S7:** Effect of different surfactants on the morphology of the attained  $\text{Cu}_2\text{O}$ -Ag heterostructures : a) Oxalic acid, b) Citrate, c) SDS, d) PVP

**Table S1:** Peak frequencies (cm<sup>-1</sup>) and their assignments for SERS/Raman spectra of p-MA.

| Reference Raman | SERS | Peak Assignment                   |
|-----------------|------|-----------------------------------|
| 1598            |      | vCC (a <sub>1</sub> )             |
| 1572            | 1576 | vCC (b <sub>2</sub> )             |
| 1490            | 1475 | vCC + δCH (a <sub>1</sub> )       |
| 1480            |      | vCC + δCH (a <sub>1</sub> )       |
| 1445            | 1436 | vCC + δCH (b <sub>2</sub> )       |
| 1403            | 1390 | δCH + vCC (b <sub>2</sub> )       |
| 1310            | 1308 | vCC + δCH (b <sub>2</sub> )       |
| 1266            |      | vCH(a <sub>1</sub> )              |
| 1206            |      | vCH(a <sub>1</sub> )              |
| 1173            | 1191 | δCH(a <sub>1</sub> )              |
| 1142            | 1144 | δCH (b <sub>2</sub> )             |
| 1118            |      | δCH (b <sub>2</sub> )             |
| 1089            | 1078 | vCS + vCC(a <sub>1</sub> )        |
| 1011            | 1007 | γCC + γCCC (a <sub>1</sub> )      |
| 960             | 950  | πCH(a <sub>2</sub> )              |
|                 | 921  | πCH (b <sub>1</sub> )             |
| 820             | 820  | πCH (b <sub>1</sub> )             |
|                 | 750  | πCH (b <sub>2</sub> )             |
|                 | 723  | πCH + πCS + πCC (b <sub>1</sub> ) |
| 633             | 634  | γCCC (a <sub>1</sub> )            |

v-stretch; δ,γ-bend; π-wag; a<sub>1</sub>, b<sub>2</sub>: in plane mode; a<sub>2</sub>, b<sub>1</sub>: out of plane mode of benzene ring vibrations

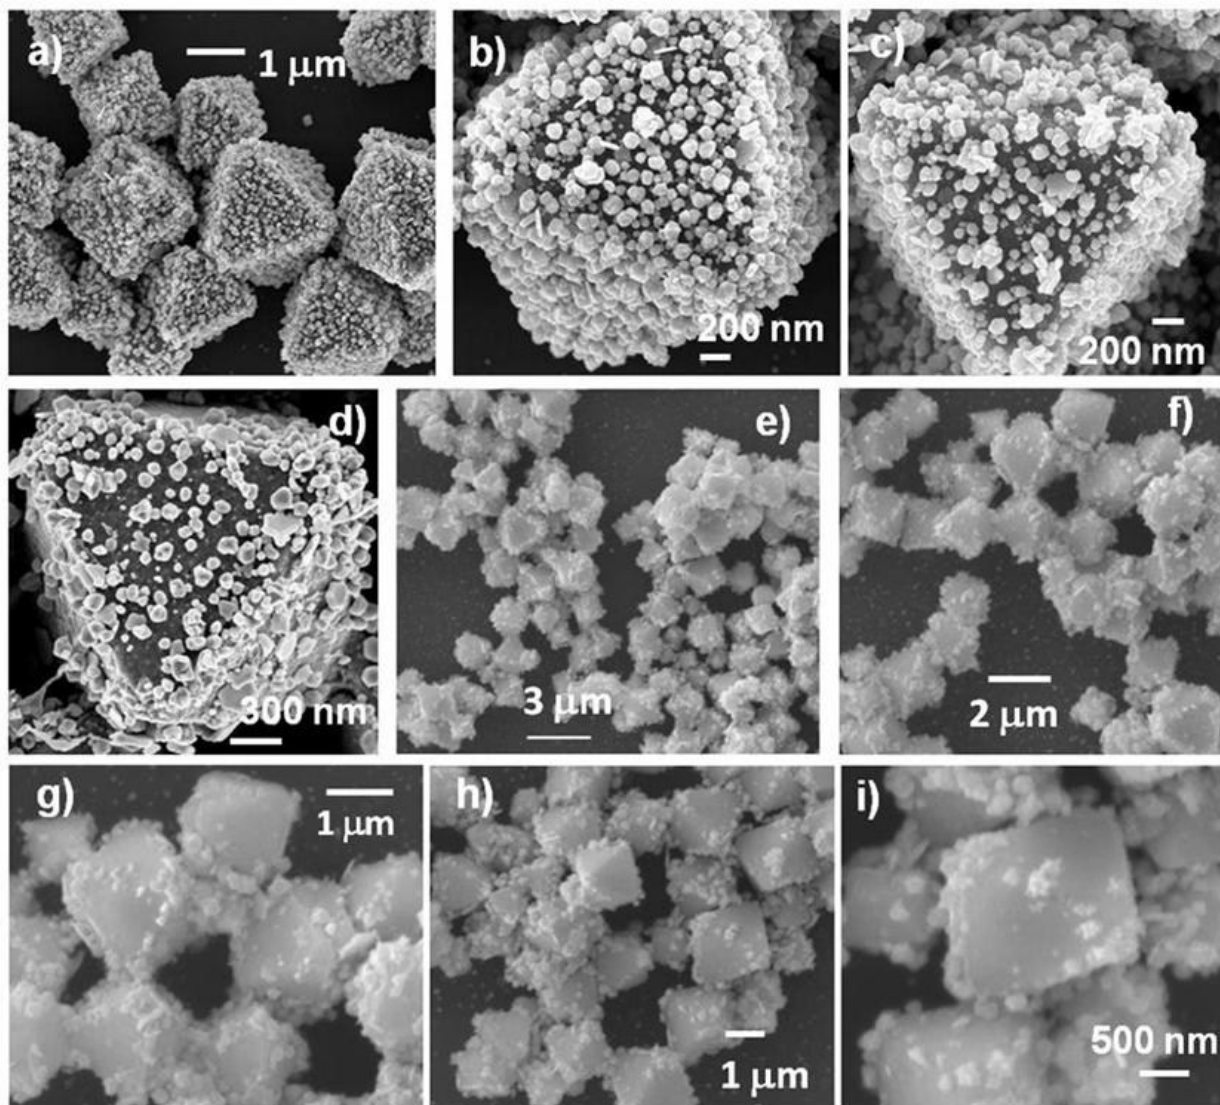

**Figure S8:** SEM images showing selective deposition of tips and edges, followed by facets for  $\text{Cu}_2\text{O}$  octahedral for 5SSA- $\text{Ag}^+$  system at increasing concentration. At low concentrations, tips and edges get preferentially decorated (e-i) with no deposition on the facets. At increased concentration, facets start progressively decorating ultimately leading to fully decorated octahedral (a-d) heterostructures. Utilized  $[\text{AgNO}_3]$  are: h-i) 10mM; e-g) 20mM; d) 50mM; b-c) 75mM; a) 100mM respectively.

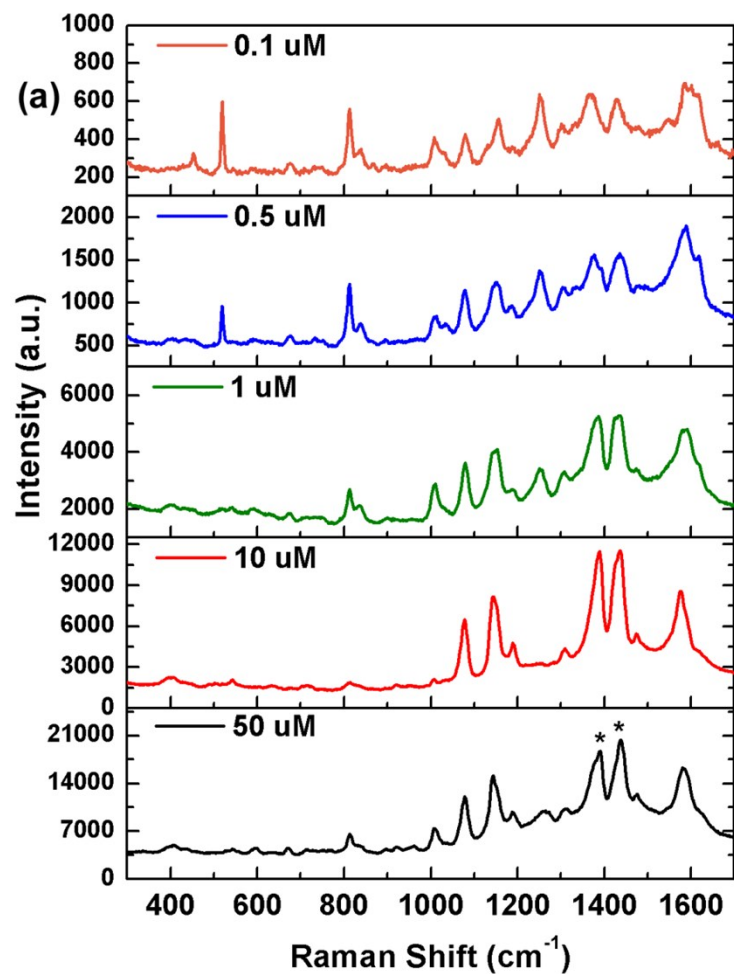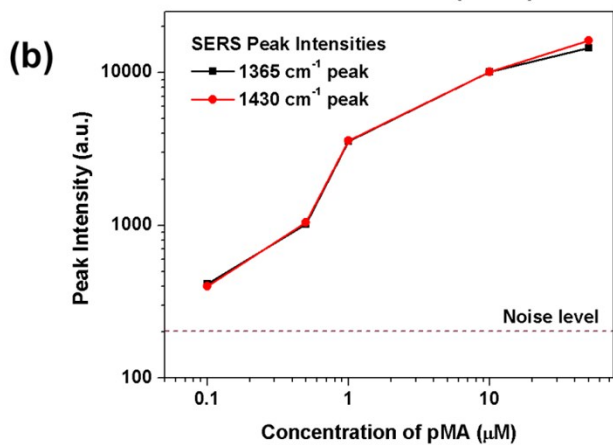

**Figure S9:** a) SERS spectra of p-MA at different concentrations showing the change in the SERS signal, b) Intensity of highlighted peaks ( $1365, 1430 \text{ cm}^{-1}$ ) as a function of p-MA concentrations.



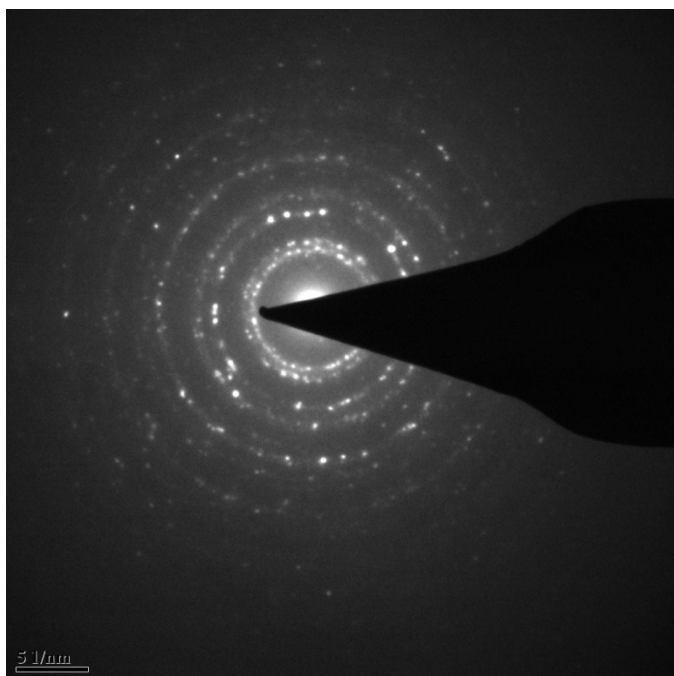

**Figure S10:** SAED pattern collected from a Au-Ag hollow mesocage showing the polycrystalline nature of the Au and Ag NPs comprising the mesocage.

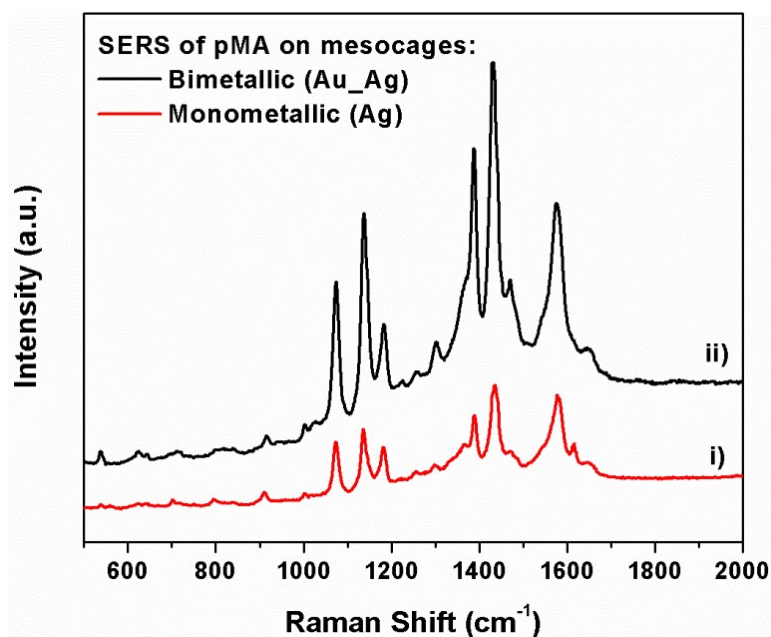

**Figure S11:** SERS spectra of pMA acquired using i) monometallic Ag and ii) bimetallic Ag-Au hollow mesocages as SERS substrate.

**Table S2:** Elemental concentrations as obtained using ICP-AES analysis

| <b>Au-Ag-Cu<sub>2</sub>O heterostructure</b> |                |                |
|----------------------------------------------|----------------|----------------|
| <b>Cu(ppm)</b>                               | <b>Ag(PPM)</b> | <b>Au(ppm)</b> |
| <b>4119.04</b>                               | <b>114.62</b>  | <b>8.69</b>    |
|                                              |                |                |
| <b>Au-Ag hollow mesocages</b>                |                |                |
| <b>Cu(ppm)</b>                               | <b>Ag(ppm)</b> | <b>Au(ppm)</b> |
| <b>4.5</b>                                   | <b>85.3</b>    | <b>8.65</b>    |
